# Supplementary material for: Uncoupling of an ammonia channel as a mechanism of allosteric inhibition in anthranilate synthase of Serratia marcescens : dynamic and graph theoretical analysis
Source: Royal Society of Chemistry journal article supplement (doi:10.1039/c6mb00646a), 2016-11-01
Supplement: c6mb00646a1.pdf [file c6mb00646a1.pdf]

## Supplementary Text

### Comparison of tetrameric structures of Anthranilate Synthase in three states from *S. solfataricus*, *S. marcescens* and *S. typhimurium*

Anthranilate Synthase shows similar subunit or domain organization in bacteria like *Serratia marcescens*, *Salmonella typhimurium* and *Sulfolobus solfataricus*. However the oligomeric structure of all these enzymes show considerable difference<sup>1-3</sup>. In the substrate and inhibitor bound form of the AS in *S.marcescens* and inhibitor bound form of the AS from *S. typhimurium*, the heterotetrameric interface is formed by TrpE chains whereas in the unbound form of the AS from *S. solfataricus* it is formed by the TrpG chains. These differences in the quaternary structures have been attributed to the differences in molecular binding. AS from *S. marcescens* and *S. typhimurium* show cooperative Chorismate and Tryptophan binding, whereas the one from *S. solfataricus* does not show cooperative binding<sup>1-4</sup>. Another member of the Chorismate utilizing enzyme family, 2-Amino-2-deoxyisochorismate (ADIC) Synthase from *Burkholderia lata* shows very similar domain organization but very different oligomeric (in this case dimeric) structure<sup>5</sup>. Figure I shows all these different structures highlighting varied multimeric structures. Interestingly, given the variability among the AS from different species, there is no structural information available for AS in unbound, substrate-bound, and inhibitor-bound states in a single organism, so that a clear comparison can be made about its structure-function relationships.

In a recent study<sup>6</sup> the structure of AS from *Mycobacterium tuberculosis* has been determined. Although, the structure of the AS I (TrpE) in this was similar to the already determined TrpE structure in *S. marcescens* and *S. typhimurium* the AS II (TrpG) chain was not resolved. Interestingly the oligomeric structure is very different from those observed in other AS structures. The heterotetramer interface is formed by AS I residues but of different region as compared to that in *S. marcescens*. The heterodimer interface however is assumed to be similar to the other AS structures determined till now. This further suggests the similarity in the heterodimer functionality between AS from different organisms.

### Equivalence of contact analysis in two dimers of AS

Heterotetramer structures of substrate bound and inhibitor bound AS from *S.marcescens* were modelled as PCNs. Total 364 contacts were lost and 251 contacts were made in the inhibitor-bound complex (AS-Inhibitor) as compared to substrate-bound complex (AS-Substrate). Out of total 364 contacts lost 174 contacts belonged to heterodimer formed by chains A and B (dimer-AB), 188 contacts belonged to heterodimer formed by chains C and D (dimer-CD) and two contacts were at the heterotetramer interface. Similarly, out of 251 contacts gained in the heterotetramer, 122 contacts belonged to dimer-AB, 127 belonged to dimer-CD and two contacts belonged to heterotetramer interface. Most of the contacts lost (151 out of 174 in dimer-AB and 188 in dimer-CD) and gained (91 out of 122 in dimer AB and 127 in dimer-CD) in two heterodimers are equivalent. Since the contacts lost and gained were similar in the two heterodimers except at the heterotetramer interface, the detailed analysis has been presented only for one heterodimer comprising of chains A and B in both the structures.

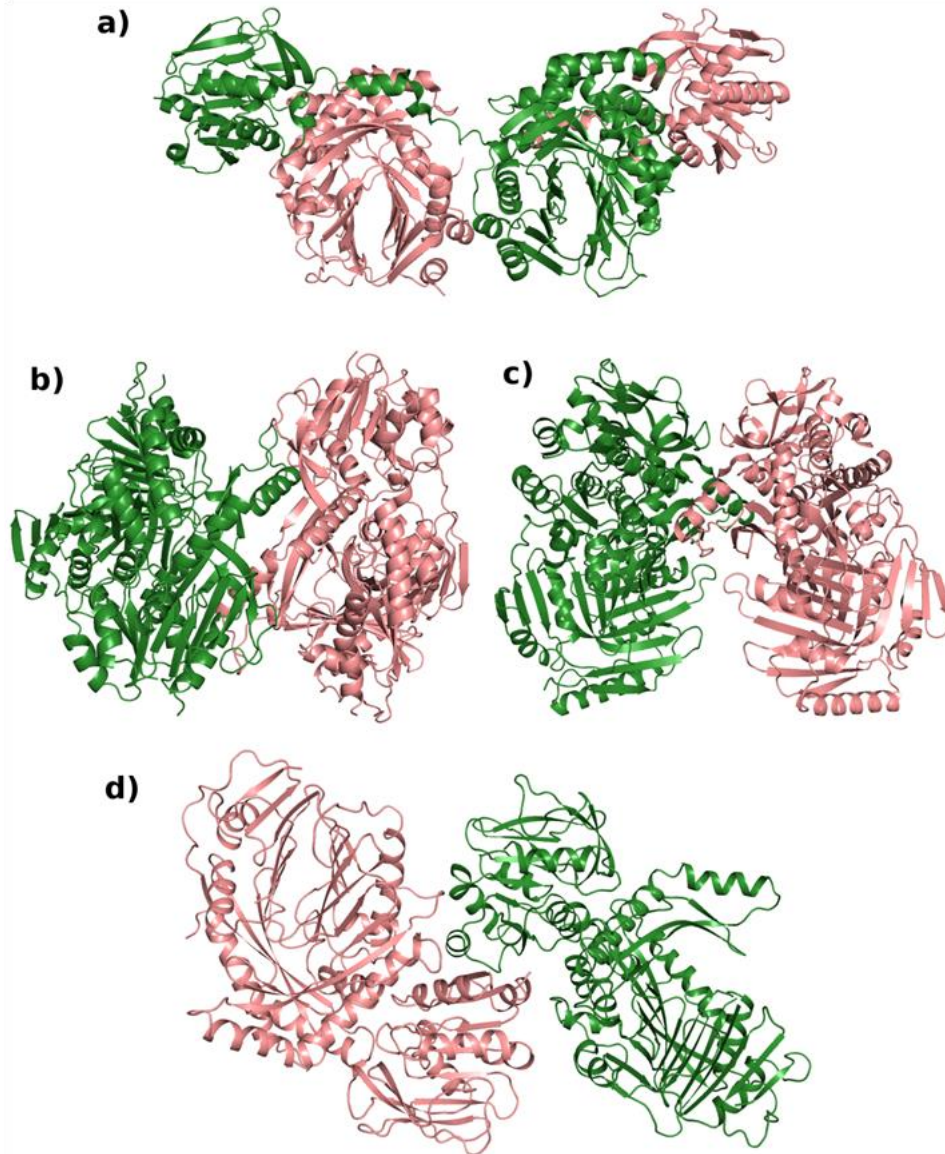

**Figure I** Anthranilate Synthase structures from a) *Burkholderia lata* (PDB ID 3R76 ), b) *Salmonella typhimurium* (PDB ID 1I1Q ), c) *Serratia marcescens* (PDB ID 1I7Q ), and d) *Sulfolobus solfataricus* (PDB ID 1QDL). The two components of the functional bienzyme (TrpE and TrpG) are shown in single color (Pink and Green, respectively)

### Changes in the Root Mean Square Fluctuations in AS residues on Inhibitor Binding

Root Mean Square Fluctuation represents the flexibility of the residues. Generally, the RMSF in both the proteins, do not show much difference, but few residues exhibit marked difference in flexibility. Residue number 330-360, which forms the hetero-tetramer interface, showed higher fluctuations in case of AS-inhibitor (see Figure S6). Some of the residues (106, 107 and 108) at

the heterodimer interface also show elevated RMSF values. These residues lose several contacts with residues from both TrpE and TrpG which might be causing the increase in flexibility.

### Supplementary References

- 1 A. A. Morollo and M. J. Eck, *Nat. Struct. Biol.*, 2001, **8**, 243–247.
- 2 T. Knöchel, A. Ivens, G. Hester, A. Gonzalez, R. Bauerle, M. Wilmanns, K. Kirschner and J. N. Jansonius, *Proc. Natl. Acad. Sci. U. S. A.*, 1999, **96**, 9479–84.
- 3 G. Spraggon, C. Kim, X. Nguyen-Huu, M. C. Yee, C. Yanofsky and S. E. Mills, *Proc. Natl. Acad. Sci. U. S. A.*, 2001, **98**, 6021–6.
- 4 M. G. Caligiuris and R. Bauerles, *J. Biol. Chem.*, 1991, **266**, 8328–8335.
- 5 Q.-A. Li, D. V Mavrodi, L. S. Thomashow, M. Roessle and W. Blankenfeldt, *J. Biol. Chem.*, 2011, **286**, 18213–21.
- 6 G. Bashiri, J. M. Johnston, G. L. Evans, E. M. M. Bulloch, D. C. Goldstone, E. N. M. Jirgis, S. Kleinboelting, A. Castell, R. J. Ramsay, A. Manos-Turvey, R. J. Payne, J. S. Lott and E. N. Baker, *Acta Crystallogr. Sect. D Biol. Crystallogr.*, 2015, **71**, 2297–2308.

## Supplementary Figures

**Figure S1- Structure of Anthranilate Synthase heterodimer with all the contacts lost (red lines) and gained (blue lines)**

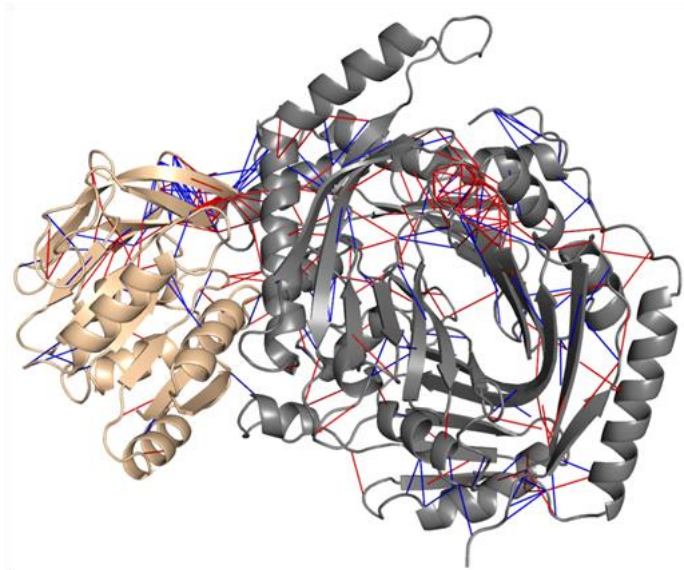

**Figure S2** The cavities between two active sites become solvent exposed on inhibitor binding. Cavities between the active sites of TrpE and TrpG, determined by CASTp in a) AS-substrate and b) AS-inhibitor. The cavities have been shown in red surface representation and the substrate binding residues have been shown in red stick representation

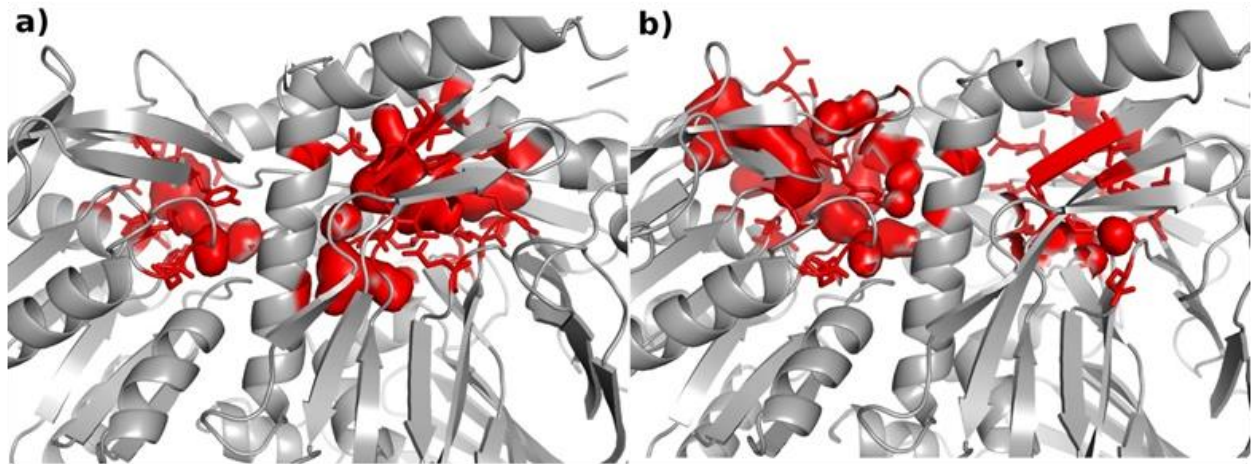

**Figure S3-** Structure of AS heterodimer with residues colored as per conservation score, obtained from ConSurf server, grading from most conserved (Magenta) to least conserved (Teal). The residues participating in the shortest paths between two active sites have been shown as spheres.

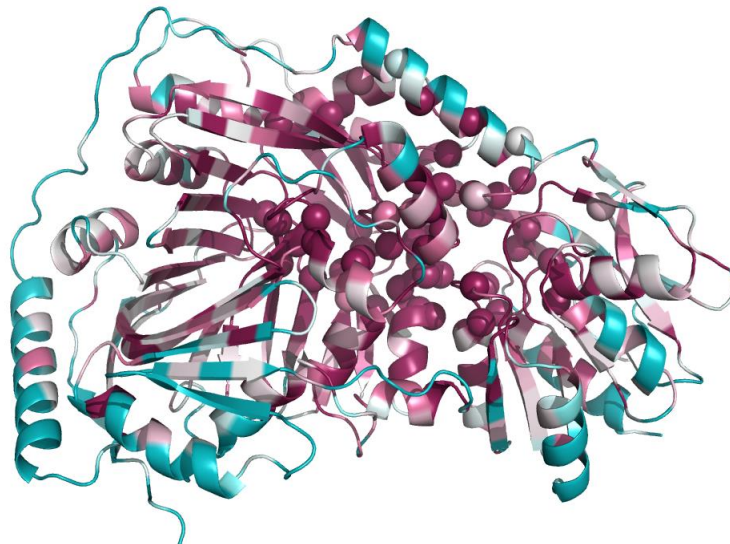

**Figure S4** Root mean square deviation of frames of MD simulation trajectories of AS-substrate and AS-inhibitor.

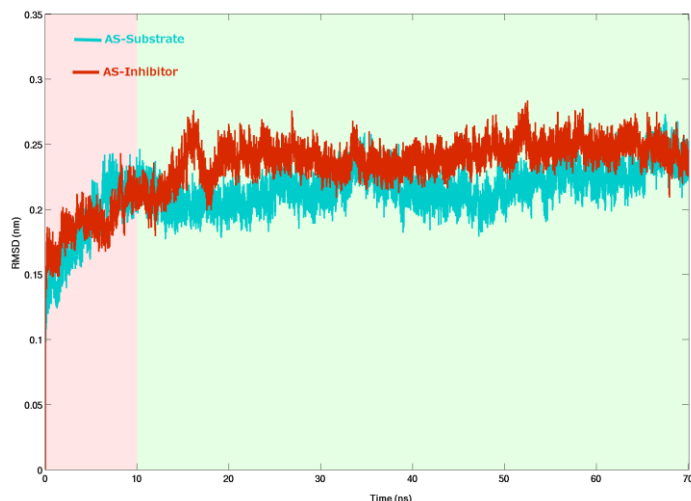

**Figure S5** Difference in Root Mean Square Fluctuations of the  $C\alpha$  atoms in AS-substrate and AS-inhibitor show increased fluctuations for certain residues. a) Difference of RMSF for all residues b) Residues showing high increase (green spheres) and high decrease (yellow spheres) in RMSF in inhibitor bound complex. The TrpE subunit is shown in Grey and TrpG subunit in Wheat color. The residues in the top part of helix  $\alpha 7$ , showing some increase in RMSF are at the hetero-tetramer interface. Since we are considering only the dimer, that helix is solvent exposed and therefore shows high fluctuations in general. Rest of the increases in RMSFs is seen generally in the residues at the termini and loops.

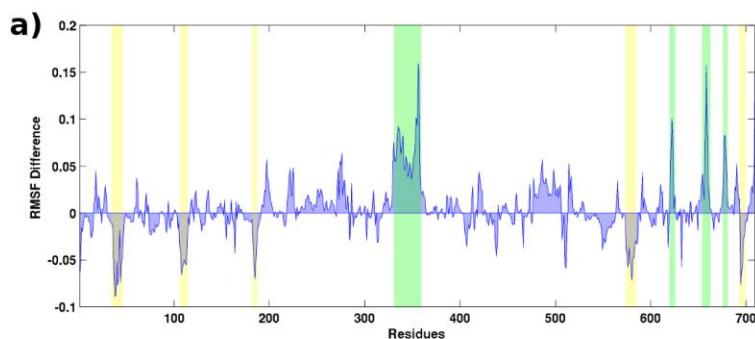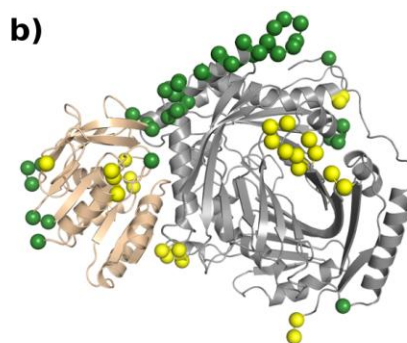

**Figure S6.** The residue pairs showing increase (shown in orange) and decrease (shown in blue) in dynamic correlations mapped on the crystal structure.

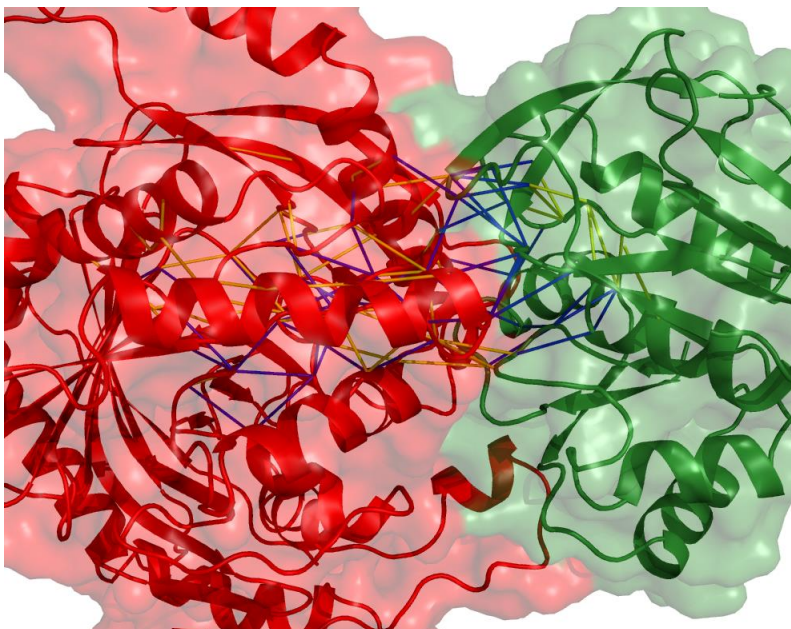

## Supplementary Tables

**Table S1-** Residues showing change ( $\geq 3$ ) in degree between AS-Inhibitor and AS-Substrate

| Residues (Chain) | Increase | Residues   | Decrease |
|------------------|----------|------------|----------|
| 103 (TrpG)       | 8        | 106 (TrpG) | 6        |
| 104 (TrpG)       | 5        | 108 (TrpG) | 5        |
| 519 (TrpE)       | 3        | 138 (TrpG) | 5        |
| 488 (TrpE)       | 3        | 425(TrpE)  | 4        |
| 257 (TrpE)       | 3        | 107 (TrpG) | 4        |
| 191 (TrpE)       | 3        | 198(TrpE)  | 3        |
| 162 (TrpE)       | 3        | 262(TrpE)  | 3        |
|                  |          | 288(TrpE)  | 3        |
|                  |          | 361(TrpE)  | 3        |
|                  |          | 422 (TrpE) | 3        |
|                  |          | 430 (TrpE) | 3        |
|                  |          | 505 (TrpE) | 3        |
|                  |          | 306 (TrpE) | 3        |
|                  |          | 136 (TrpG) | 3        |
|                  |          | 156 (TrpG) | 3        |
|                  |          | 135 (TrpG) | 3        |



**Table S2-** List of all the hubs in AS-Substrate and AS-Inhibitor, residues in bold are unique to corresponding PCN

| Hubs in AS-Substrate                                                                                                                                                                                                                                                                                                                               | Hubs in AS-Inhibitor                                                                                                                                                                                                                                                    |
|----------------------------------------------------------------------------------------------------------------------------------------------------------------------------------------------------------------------------------------------------------------------------------------------------------------------------------------------------|-------------------------------------------------------------------------------------------------------------------------------------------------------------------------------------------------------------------------------------------------------------------------|
| TrpE- <b>35</b> , 54, <b>57</b> , 151, 152, <b>194</b> , <b>196</b> , <b>256</b> , <b>259</b> , <b>261</b> , <b>284</b> , <b>306</b> , 307, 371, 374, 377, <b>398</b> , 402, 403, <b>430</b> , 434, <b>452</b> , 457, 464, 465, <b>466</b> , 467, 478<br>TrpG- <b>5</b> , 6, 8, 33, 56, 83, 84, 87, 88, <b>89</b> , <b>92</b> , 130, 131, 168, 178 | TrpE- 54, <b>58</b> , 151, 152, <b>178</b> , <b>191</b> , 307, <b>314</b> , 371, 374, 377, 402, 403, <b>405</b> , 434, 457, 464, 465, 467, 478, <b>480</b> , <b>506</b> , <b>509</b><br>TrpG- 6, 8, 33, 56, 83, 84, <b>85</b> , 87, 88, <b>103</b> , 130, 131, 168, 178 |

**Table S3-** Residues with high betweenness, common ones are in bold

| AS-Substrate                                                                                                          | AS-Inhibitor                                                                                                                    |
|-----------------------------------------------------------------------------------------------------------------------|---------------------------------------------------------------------------------------------------------------------------------|
| 309, <b>311</b> , <b>324</b> , <b>326</b> , 332, 345, <b>351</b> , <b>383</b> , 389, 395, 401, 505, <b>179</b> (TrpG) | 310, <b>311</b> , <b>324</b> , <b>326</b> , 328, 346, 348, <b>351</b> , 352, 355, 367, <b>383</b> , 424, 465, <b>179</b> (TrpG) |

**Table S4-** Community membership of all the nodes in two PCNs

| AS Substrate   |                                                                                                    | AS- Inhibitor  |                                                                                                              |
|----------------|----------------------------------------------------------------------------------------------------|----------------|--------------------------------------------------------------------------------------------------------------|
| Community Name | Nodes                                                                                              | Community Name | Nodes                                                                                                        |
| <b>CS1</b>     | <b>TrpE-</b> 4-106, 122-199, 223, 235-241, 261-275, 288-332, 361-408,420-487<br><b>TrpG-</b> 11-26 | <b>CI1</b>     | <b>TrpE-</b> 4-107, 122-161, 169-199, 234-240, 267-275, 289-332, 355-411, 445-483, 503<br><b>TrpG-</b> 12-28 |
| <b>CS2</b>     | <b>TrpE-</b> 107-121, 224-234, 242-260, 276-287, 360, 488-520<br><b>TrpG-</b> 2-10, 27-195         | <b>CI2</b>     | <b>TrpE-</b> 108-121, 162, 241-266, 422-443, 484-502, 504<br><b>TrpG-</b> 2-11, 29-195                       |
| <b>CS3</b>     | <b>TrpE-</b> 200-222                                                                               | <b>CI3</b>     | <b>TrpE-</b> 163-168, 444                                                                                    |
| <b>CS4</b>     | <b>TrpE-</b> 409-419                                                                               | <b>CI4</b>     | <b>TrpE-</b> 200-233, 276-288, 505, 507-520                                                                  |
| <b>CS5</b>     | <b>TrpE-</b> 333-359                                                                               | <b>CI5</b>     | <b>TrpE-</b> 333-354                                                                                         |
|                |                                                                                                    | <b>CI6</b>     | <b>TrpE-</b> 412, 414-421                                                                                    |

**Table S5-** SASA values for the residues lining the paths determined by Mole2. Highlighted residues are common in two tunnels.

| Tunnel Comparison  |              |              |                    |              |              |
|--------------------|--------------|--------------|--------------------|--------------|--------------|
| 1I7Q               | SASA in 1I7Q | SASA in 1I7S | 1I7S               | SASA in 1I7Q | SASA in 1I7S |
| 262 PHE A          | 16.43        | 34.08        | 262 PHE A          | 16.43        | 34.08        |
| 58 GLY B Backbone  | 12.96        | 27.71        | 85 CYS B           | 5.8          | 18.56        |
| 85 CYS B           | 5.8          | 18.56        | 134 HIS B          | 21.72        | 67.88        |
| 133 TYR B Backbone | 16.79        | 23.91        | 172 HIS B          | 16.18        | 26.69        |
| 57 PRO B           | 14.44        | 22.09        | 58 GLY B Backbone  | 12.96        | 27.71        |
| 172 HIS B          | 16.18        | 26.69        | 59 PRO B Backbone  | 32.67        | 56.15        |
| 11 ASP B           | 12.7         | 24.26        | 430 PRO A          | 16.32        | 26.73        |
| 13 PHE B           | 15.57        | 19.24        | 259 GLY A Backbone | 13.26        | 30.19        |
| 430 PRO A          | 16.32        | 26.73        | 260 GLU A Backbone | 42.62        | 68.11        |
| 430 PRO A Backbone | 16.32        | 26.73        | 261 ILE A Backbone | 11.71        | 14.96        |
| 12 SER B           | 12.26        | 19.18        | 105 ILE B          | 28.03        | 27.36        |
| 429 ALA A          | 14.73        | 13.6         | 104 GLU B Backbone | 100.25       | 35.55        |
| 368 LEU A          | 13.84        | 19.9         | 256 ILE A          | 9.77         | 12.94        |
| 364 MET A Backbone | 16.35        | 14.75        | 262 PHE A Backbone | 16.43        | 34.08        |
| 365 LEU A          | 16.91        | 33.25        | 488 GLN A          | 43.11        | 40.11        |
| 364 MET A          | 16.35        | 14.75        | 105 ILE B Backbone | 28.03        | 27.36        |
| 263 GLN A          | 21.8         | 39.22        | 106 LEU B Backbone | 28.1         | 87.58        |
| 428 GLY A Backbone | 14.46        | 18.02        | 106 LEU B          | 28.1         | 87.58        |
| 429 ALA A Backbone | 14.73        | 13.6         | 487 VAL A          | 13.78        | 37.34        |
| 424 GLY A Backbone | 12.11        | 19.92        | 361 GLU A          | 17           | 83.19        |
| 265 VAL A          | 15.45        | 18.41        | 489 ASP A          | 43.93        | 92.35        |
| 425 THR A Backbone | 17.2         | 80.5         | 357 LYS A          | 18.13        | 112.79       |
| 327 ALA A          | 13.22        | 30.83        | 490 SER A          | 14.76        | 21.03        |
| 361 GLU A          | 17           | 83.19        | 495 GLU A          | 16.74        | 20.27        |

|                       |       |        |                       |       |       |
|-----------------------|-------|--------|-----------------------|-------|-------|
| 326 ILE A<br>Backbone | 10.71 | 53.74  | 498 GLU A<br>Backbone | 17.16 | 68.79 |
| 327 ALA A<br>Backbone | 13.22 | 30.83  | 486 VAL A<br>Backbone | 15.38 | 16.49 |
| 485 GLY A<br>Backbone | 15.18 | 31.19  | 485 GLY A<br>Backbone | 15.18 | 31.19 |
| 502 LYS A             | 17.37 | 87.39  | 502 LYS A             | 17.37 | 87.39 |
| 469 ARG A             | 32.11 | 115.08 | 425 THR A<br>Backbone | 17.2  | 80.5  |
| 426 LEU A             | 20.28 | 30.85  | 265 VAL A             | 15.45 | 18.41 |
| 309 GLU A             | 13.27 | 34.7   | 426 LEU A             | 20.28 | 30.85 |
| 468 ILE A             | 10.95 | 34.04  | 483 GLY A<br>Backbone | 12.8  | 21.15 |
|                       |       |        | 449 TYR A             | 16.5  | 26.31 |

**Table S6-** Details of the pockets determined by CASTp that exist between the substrate binding site of TrpE and TrpG.

| 1i7q |       |                           |                           |                          |                          |
|------|-------|---------------------------|---------------------------|--------------------------|--------------------------|
| ID   | N_mth | Area_sa (Å <sup>2</sup> ) | Area_ms (Å <sup>2</sup> ) | Vol_sa (Å <sup>3</sup> ) | Vol_ms (Å <sup>3</sup> ) |
| 102  | 0     | 146                       | 448.82                    | 56.344                   | 453.64                   |
| 99   | 0     | 37                        | 164.22                    | 7.265                    | 141.55                   |
| 96   | 0     | 47                        | 186.31                    | 16.263                   | 164.25                   |
| 85   | 0     | 6.3                       | 64.35                     | 0.721                    | 44.39                    |
| 63   | 0     | 3.4                       | 50.28                     | 0.266                    | 32.08                    |
| 59   | 0     | 1.3                       | 42.13                     | 0.059                    | 24.17                    |
| 34   | 0     | 0.7                       | 45.43                     | 0.016                    | 21.81                    |
|      |       |                           |                           |                          |                          |
| 1i7s |       |                           |                           |                          |                          |
| ID   | N_mth | Area_sa (Å <sup>2</sup> ) | Area_ms (Å <sup>2</sup> ) | Vol_sa (Å <sup>3</sup> ) | Vol_ms (Å <sup>3</sup> ) |
| 112  | 5     | 345                       | 826.92                    | 125.55                   | 901.69                   |
| 96   | 1     | 26                        | 87.02                     | 9.587                    | 77.54                    |
| 91   | 0     | 4.9                       | 73.37                     | 0.442                    | 39.99                    |
| 88   | 0     | 3.8                       | 81.47                     | 0.197                    | 42.01                    |
| 54   | 1     | 1.2                       | 25.48                     | 0.032                    | 16.13                    |
| 51   | 0     | 0.9                       | 38.43                     | 0.041                    | 21.37                    |
| 25   | 0     | 0.1                       | 29.98                     | 0.001                    | 14.81                    |
| 24   | 0     | 0                         | 25.2                      | 0                        | 11.88                    |
| 13   | 0     | 0                         | 29.28                     | 0                        | 13.21                    |
| 6    | 0     | 0                         | 30.37                     | 0                        | 12.79                    |

N\_mth- Number of mouths

Area\_sa- Solvent Accessible Area

Area\_ms- Molecular Surface Area

Volume\_sa- Solvent Accessible Volume

Volume\_ms- Molecular Surface Volume
